# Supplementary material for: Antimicrobial peptides in frog poisons constitute a molecular toxin delivery system against predators
Source: PubMed Central journal article supplement (PMC5686178; doi:10.1038/s41467-017-01710-1), 2017-11-14
Supplement: 41467_2017_1710_MOESM1_ESM.pdf [file 41467_2017_1710_MOESM1_ESM.pdf]

## Supplementary files

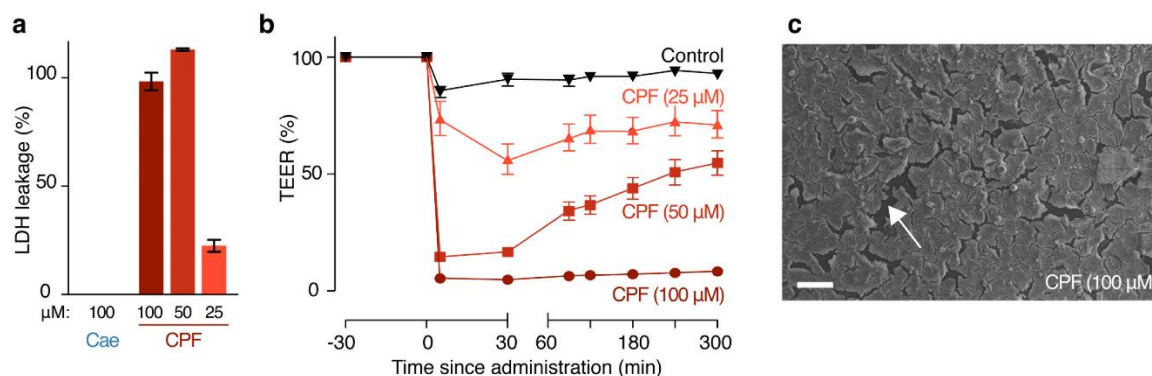

**Supplementary Figure 1 | Effect of the AMP caerulein precursor fragment (CPF) on Caco-2 model epithelia.** **a**, Lactate dehydrogenase leakage indicates cell damage in Caco-2 monolayers exposed to CPF but not to the toxin caerulein (Cae) ( $n = 9$ ; 100 % corresponds to the LDH leakage caused by complete cell lysis as induced by Triton-X). **b**, CPF induces a rapid dose-dependent drop in transepithelial electrical resistance (TEER;  $n = 7$ ). **c**, Exposure to CPF induces ruptures in Caco-2 monolayers (white arrow), as revealed by scanning electron microscopy. The scale bar represents 100 μm. Data are mean  $\pm$  s.e.m, error bars not shown when covered by data symbols.

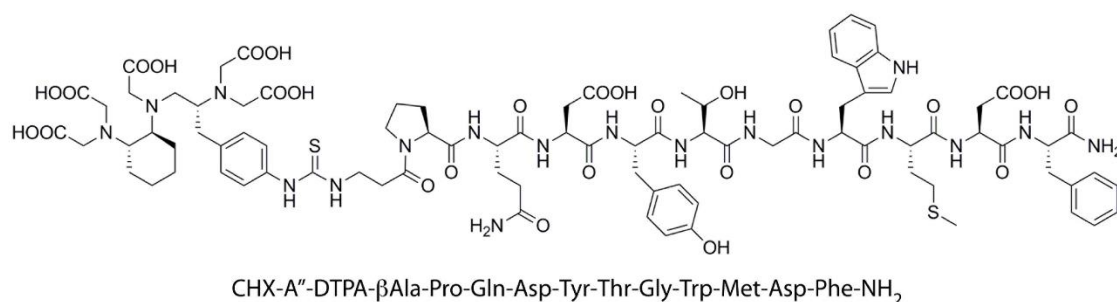

**Supplementary Figure 2 | Structural formula of CHX-A''-DTPA-βAla-caerulein used for radiolabeling.** To enable radiolabeling, a CHX-A''-DTPA chelator was anchored to the *N*-terminus of caerulein, through use of a β-alanine spacer between chelator and the toxin's sequence. Chemical formula: C<sub>87</sub>H<sub>114</sub>N<sub>18</sub>O<sub>28</sub>S<sub>2</sub>, Molecular weight: 1924.0870 Da.

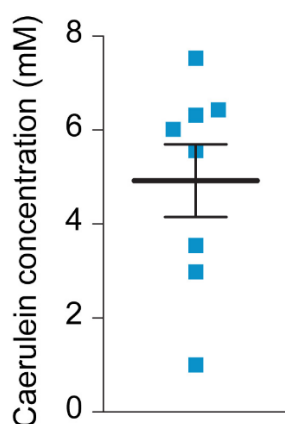

### Supplementary Figure 3 | Caerulein concentrations in *Xenopus laevis* skin secretion.

Skin secretion of eight individuals was collected and caerulein was quantified in diluted samples using ELISA (See Methods). Data are mean  $\pm$  s.e.m.

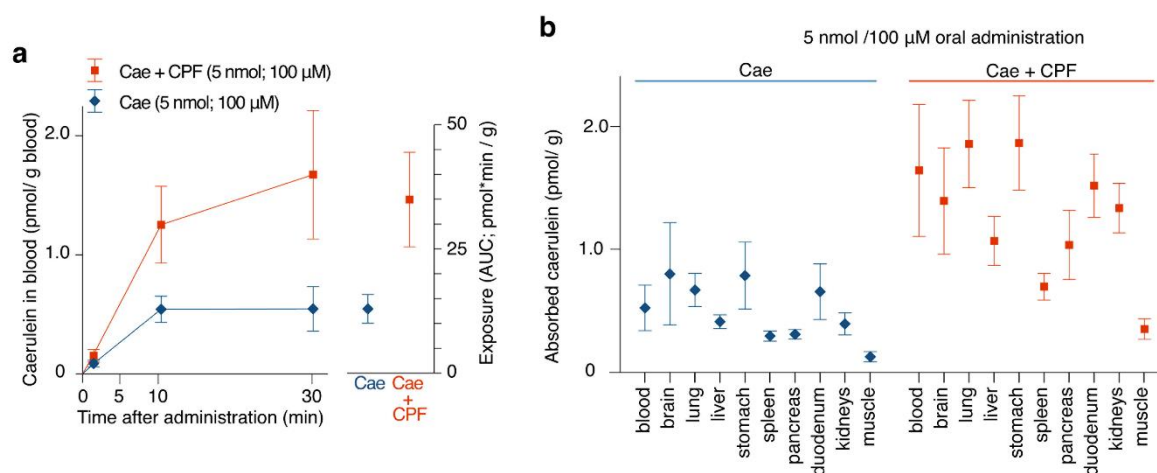

### Supplementary Figure 4 | An AMP enhances toxin absorption in a live predator at micromolar concentrations.

**a**, Oral administration of caerulein leads to a more efficient uptake of the toxin into the blood of live snakes when CPF is co-administered (left graph,  $n = 6$ , linear mixed model,  $X^2(1) = 7.9$ ,  $p = 0.005$ ), resulting in higher systemic exposure as calculated by the area-under-the curve (AUC, right graph). **b**, Co-administration of CPF results in higher caerulein levels in various organs after 30 minutes ( $n = 6$ , linear mixed model,  $X^2(1) = 10.6$ ,  $p = 0.0012$ ). Data are mean  $\pm$  s.e.m. Linear mixed models are explained in the Methods section.

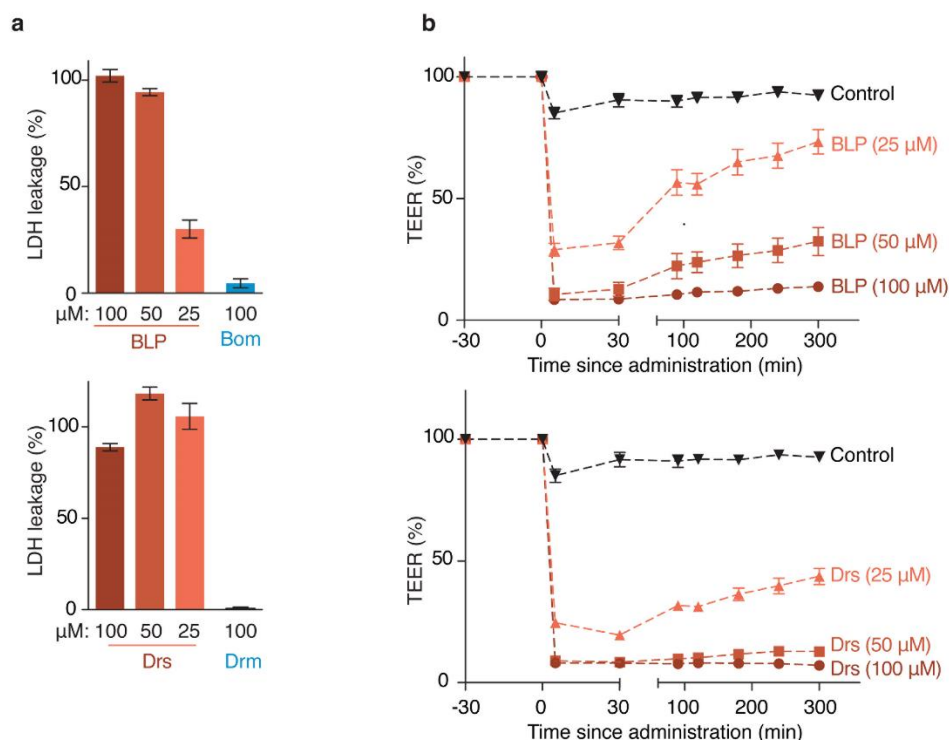

**Supplementary Figure 5 | Effect of Dermaseptin-S1 (Drs) and Bombinin-like peptide-1 (BLP) on Caco-2 model epithelia.** **a**, Lactate dehydrogenase leakage indicates cell damage in Caco-2 monolayers exposed to BLP or Drs but not to the toxins dermorphin (Drm) and bombesin (Bom) ( $n = 9$ ; 100 % corresponds to the LDH leakage caused by complete cell lysis as induced by Triton-X). **b**, Drs and BLP induce a rapid dose-dependent drop in transepithelial electrical resistance (TEER;  $n = 6-7$ ). Data are mean  $\pm$  s.e.m, error bars not shown when covered by data symbols.
